# Supplementary material
Source: PubMed Central journal article supplement (PMC3750200)
Supplement: NIHMS488142-supplement-supplement_1.pdf [file NIHMS488142-supplement-supplement_1.pdf]

**Supplemental Figure 1.** Mean (SE) adjusted composite physical health score across the different types of antihypertensive drugs within patients using antihypertensive medication (N=3,974) for the different arterial disease categories.

Adjustments were made for age, sex, BMI, smoking, alcohol, diabetes, hyperlipidemia, carotid IMT, other medication use, systolic and diastolic blood pressure, and use of other antihypertensive drug use. \* P<0.05, \*\* P<0.001: compared to the rest of the patients using antihypertensive medication.

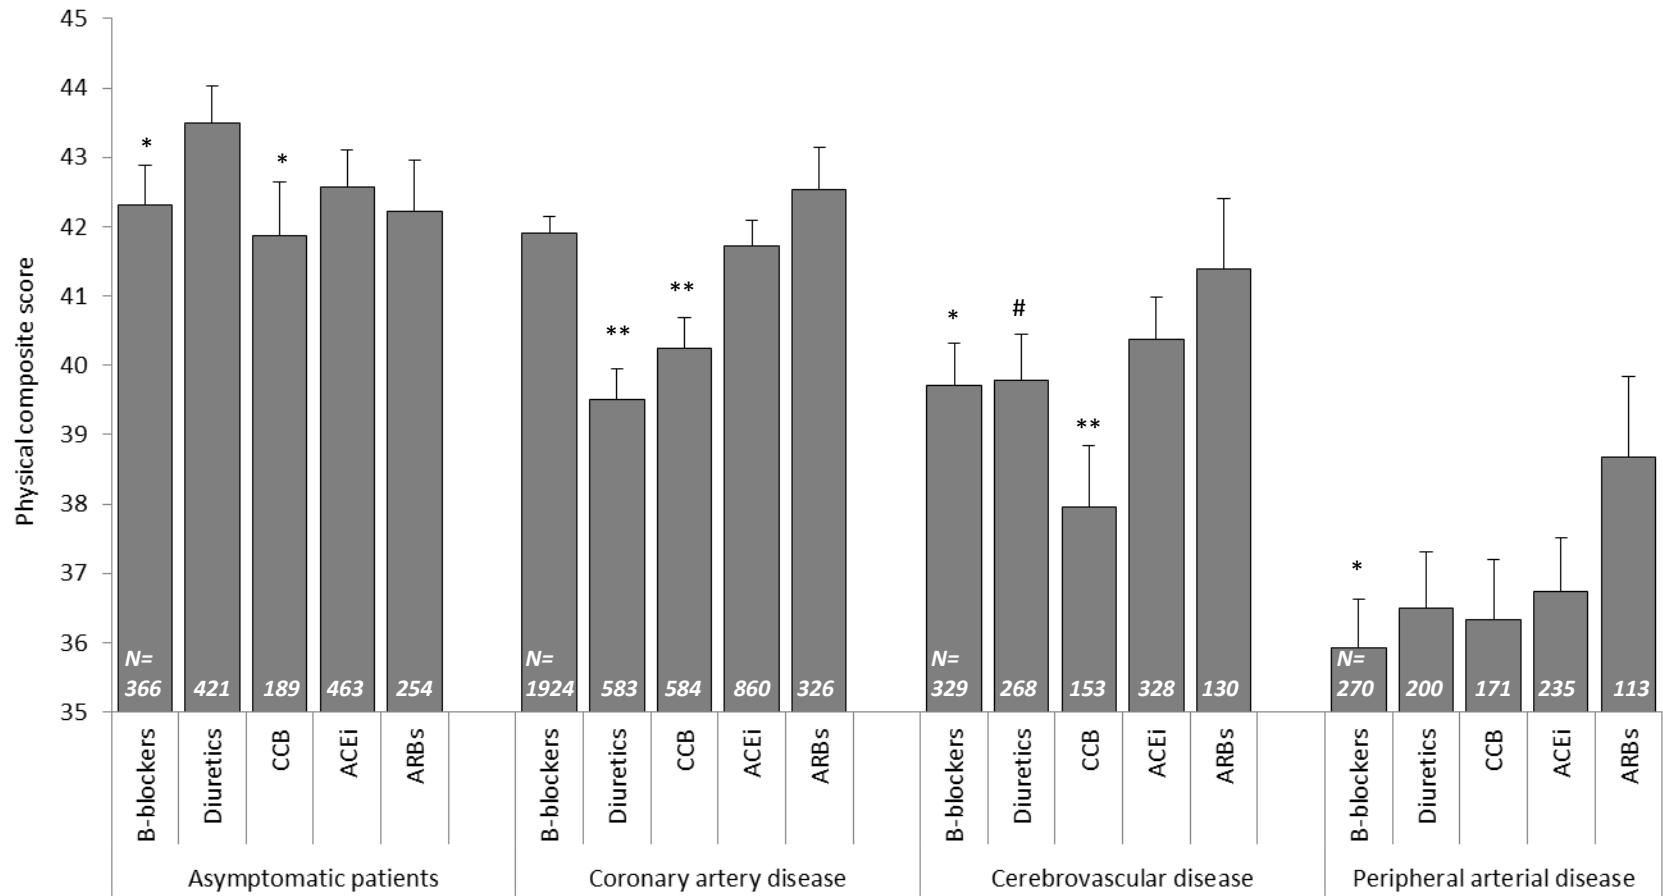

**Supplemental Table 1.** Association of antihypertensive treatment and measures of blood pressure with self-rated mental and physical health status (SF36) for the different arterial disease categories.

|                                                     | Physical health (composite score) |                  | Mental health (composite score) |                 |
|-----------------------------------------------------|-----------------------------------|------------------|---------------------------------|-----------------|
|                                                     | B                                 | (95% CI)         | B                               | (95% CI)        |
| <b>Asymptomatic patients (N=1,933)</b>              |                                   |                  |                                 |                 |
| Antihypertensive treatment (yes/no) †               | -2.71                             | (-3.72; -1.71)** | -0.55                           | (-1.60; 0.51)   |
| Systolic blood pressure (per SD) ‡                  | 0.53                              | (-0.02; 1.04)    | 0.03                            | (-0.49; 0.56)   |
| Diastolic blood pressure (per SD) ‡                 | 0.10                              | (-0.49; 0.44)    | -0.03                           | (-0.51; 0.45)   |
| <b>Coronary artery disease patients (N=2,547)</b>   |                                   |                  |                                 |                 |
| Antihypertensive treatment (yes/no) †               | -0.80                             | (-2.18; 0.59)    | -0.11                           | (-1.52; 1.31)   |
| Systolic blood pressure (per SD) ‡                  | 0.42                              | (-0.02; 0.85)#   | 0.44                            | (0.00; 0.90)*   |
| Diastolic blood pressure (per SD) ‡                 | 0.53                              | (0.09; 0.97)#    | 0.18                            | (-0.27; 0.64)   |
| <b>Cerebrovascular disease patients (N=1,061)</b>   |                                   |                  |                                 |                 |
| Antihypertensive treatment (yes/no) †               | -2.11                             | (-3.52; -0.69)** | -1.64                           | (-3.11; -0.17)* |
| Systolic blood pressure (per SD) ‡                  | 0.26                              | (-0.40; 0.92)    | 0.43                            | (-0.28; 1.13)   |
| Diastolic blood pressure (per SD) ‡                 | 0.12                              | (-0.55; 0.78)    | 0.09                            | (-0.61; 0.80)   |
| <b>Peripheral arterial disease patients (N=869)</b> |                                   |                  |                                 |                 |
| Antihypertensive treatment (yes/no) †               | -1.53                             | (-3.12; -0.05)*  | -1.31                           | (-2.97; 0.36)   |
| Systolic blood pressure (per SD) ‡                  | 0.07                              | (-0.70; 0.84)    | 0.24                            | (-0.57; 1.04)   |
| Diastolic blood pressure (per SD) ‡                 | 0.48                              | (-0.32; 1.28)    | -0.44                           | (-1.28; 0.41)   |

SD: SBP=21mmHg, DBP=12mmHg, PP=15mmHg.

\* P-linear trend <0.05; \*\* P-linear trend <0.01; # P-quadratic <0.05

† Adjusted for age, sex, SBP, DBP, BMI, smoking, alcohol, diabetes, hyperlipidemia, carotid IMT, other medication use

‡ Adjusted for age, sex, antihypertensive treatment, BMI, smoking, alcohol, diabetes, hyperlipidemia, carotid IMT, other medication use

**Supplemental Table 2.** Association of antihypertensive (AH) treatment and measures of blood pressure with risk of reduced mental or physical health for the different arterial disease categories using the domain scores (lowest quartile vs. rest).

|                         | Risk of poor physical health(low vs. high) |                |                   |                 | Risk of poor mental health(low vs. high) |                 |                 |                |
|-------------------------|--------------------------------------------|----------------|-------------------|-----------------|------------------------------------------|-----------------|-----------------|----------------|
|                         | General Health                             | Pain           | Physical Function | Role Physical   | Mental Health                            | Vitality        | Social Function | Role Emotional |
|                         | RR (95% CI)                                | RR (95% CI)    | RR (95% CI)       | RR (95% CI)     | RR (95% CI)                              | RR (95% CI)     | RR (95% CI)     | RR (95% CI)    |
| <b>Asymptomatic pts</b> |                                            |                |                   |                 |                                          |                 |                 |                |
| AH drugs (y/n) †        | 1.4 (1.2-1.6)**                            | 1.2 (1.0-1.5)* | 1.7 (1.3-2.0)**   | 1.8 (1.5-2.1)** | 1.0 (0.9-1.2)                            | 1.4 (1.2-1.6)** | 1.3 (1.1-1.6)*  | 1.2 (1.0-1.4)  |
| SBP (per SD) ‡          | 1.0 (0.9-1.1)                              | 1.0 (0.9-1.1)  | 1.0 (0.7-1.1)     | 1.0 (0.9-1.1)   | 1.0 (0.9-1.1)                            | 1.0 (0.9-1.1)   | 1.0 (0.9-1.1)   | 1.0 (0.9-1.1)  |
| DBP (per SD) ‡          | 1.0 (0.9-1.1)                              | 1.1 (1.0-1.2)  | 1.0 (0.9-1.1)     | 1.0 (0.9-1.1)   | 1.0 (0.9-1.1)                            | 1.0 (0.9-1.1)   | 1.0 (0.9-1.1)   | 1.0 (0.9-1.1)  |
| <b>CADpts</b>           |                                            |                |                   |                 |                                          |                 |                 |                |
| AH drugs (y/n) †        | 1.2 (1.0-1.5)                              | 0.9 (0.8-1.2)  | 1.1 (0.9-1.3)     | 1.2 (1.0-1.5)*  | 1.0 (0.8-1.3)                            | 1.1 (0.9-1.3)   | 1.0 (0.8-1.2)   | 1.1 (0.9-1.4)  |
| SBP (per SD) ‡          | 0.9 (0.8-1.0)*                             | 1.0 (0.9-1.1)  | 1.0 (0.9-1.1)     | 1.0 (0.9-1.1)   | 1.0 (0.9-1.1)                            | 0.9 (0.8-1.0)   | 0.9 (0.8-1.0)   | 0.9 (0.8-1.0)* |
| DBP (per SD) ‡          | 0.9 (0.8-1.0)*                             | 1.0 (0.9-1.1)  | 1.0 (0.9-1.1)     | 1.0 (0.9-1.1)   | 1.0 (0.9-1.1)                            | 1.0 (0.9-1.1)   | 1.0 (0.9-1.1)   | 0.9 (0.8-1.0)  |
| <b>CVDpts</b>           |                                            |                |                   |                 |                                          |                 |                 |                |
| AH drugs (y/n) †        | 1.5 (1.2-1.8)**                            | 1.2 (1.0-1.6)* | 1.5 (1.2-1.9)**   | 1.4 (1.2-1.6)** | 1.1 (0.9-1.3)                            | 1.3 (1.1-1.5)*  | 1.3 (1.1-       | 1.4 (1.2-      |
| SBP (per SD) ‡          | 0.9 (0.8-1.0)                              | 0.9 (0.8-1.0)  | 1.0 (0.9-1.1)     | 1.0 (0.9-1.1)   | 1.0 (0.9-1.1)                            | 1.0 (0.9-1.1)   | 0.9 (0.9-1.0)   | 1.0 (0.9-1.1)  |
| DBP (per SD) ‡          | 0.9 (0.8-1.0)*                             | 0.9 (0.8-1.0)  | 1.0 (0.9-1.1)     | 1.0 (0.9-1.1)   | 1.0 (0.9-1.1)                            | 1.1 (1.0-1.2)   | 1.0 (0.9-1.1)   | 1.0 (0.9-1.1)  |
| <b>PADpts</b>           |                                            |                |                   |                 |                                          |                 |                 |                |
| AH drugs (y/n) †        | 1.5 (1.3-1.9)**                            | 1.1 (1.0-1.3)  | 1.1 (1.0-1.3)     | 1.3 (1.1-1.6)*  | 1.1 (0.9-1.3)                            | 1.2 (1.0-1.5)*  | 1.4 (1.1-       | 1.2 (1.0-1.6)  |
| SBP (per SD) ‡          | 0.9 (0.8-1.0)                              | 1.1 (1.0-1.2)* | 1.0 (0.9-1.1)     | 1.0 (0.9-1.1)   | 1.0 (0.9-1.1)                            | 0.9 (0.8-1.0)   | 1.0 (0.9-1.1)   | 1.0 (0.9-1.1)  |
| DBP (per SD) ‡          | 0.9 (0.8-1.0)                              | 1.0 (0.9-1.1)  | 1.0 (0.9-1.1)     | 1.0 (0.9-1.1)   | 1.1 (1.0-1.3)                            | 1.0 (0.9-1.1)   | 1.0 (0.9-1.1)   | 1.0 (0.9-1.1)  |

Asymptomatic patients, N=1,933; Coronary artery disease (CAD), N=2,547; Cerebrovascular disease (CVD), N=1,061; Peripheral arterial disease (PAD), N=869

† Adjusted for age, sex, SBP, DBP, BMI, smoking, alcohol, diabetes, hyperlipidemia, carotid IMT, other medication use. ‡ Adjusted for age, sex, antihypertensive drugs, BMI, smoking, alcohol, diabetes, hyperlipidemia, carotid IMT, other medication use.
